# Supplementary material
Source: Springer Nature journal article supplement (https://www.springermedizin.de/resource/supplementary/12883_2013_987_MOESM4_ESM.docx/9456618)
Supplement: MOESM4 [file 9456618]

**Table 4. Actigraphy results**

Results are mean±SD

|  | **RBD+** | **RBD-** | **p** |
| --- | --- | --- | --- |
| N | 23 | 22 |  |
|  |  |  |  |
| **Actigraphy night 1** |  |  |  |
| Total sleep time (min) | 396.5±72.0 | 429.1±58.4 | .103 |
| Sleep efficiency | 82.7±12.3 | 87.6±8.7 | .133 |
| Sleep latency (min) | 3.3±6.5 | 2.4±4.7 | .580 |
| No wake bouts | 78.4±46.1 | 49.5±22.2 | ***.011*** |
| Length wake bouts (min) | 1.1±0.5 | 1.2±0.6 | .488 |
| Total activity score | 12943.8±11432.2 | 10132.6±6847.6 | .325 |
| Mean activity score | 6.9±5.7 | 5.4±3.9 | .299 |
|  |  |  |  |
| **Actigraphy mean of 8 nights** |  |  |  |
| Total sleep time (min) | 397.4±91.1 | 389.5±64.1 | .738 |
| Sleep efficiency | 78.4±14.6 | 84.7±9.5 | .097 |
| Sleep latency (min) | 10.0±10.6 | 5.8±10.3 | .187 |
| No wake bouts | 73.2±40.2 | 48.4±23.3 | ***.016*** |
| Length wake bouts (min) | 1.3±0.6 | 1.4±0.5 | .689 |
| Total activity score | 17885.2±14375.8 | 12613.9±9793.2 | .160 |
| Mean activity score | 10.4±11.5 | 7.2±5.4 | .231 |
